# Supplementary material
Source: publisher figshare collection journal article supplement (https://acs.figshare.com/ndownloader/files/13765874)
Supplement: Supplementary file 1 [file 13765874]

## Supporting Information

### Surface-nanostructured single silver nanowire: a new one-dimensional microscale SERS interface

Mengmeng Chen,<sup>†,‡</sup> Huanhuan Zhang,<sup>†,‡</sup> Yue Ge,<sup>†</sup> Shuo Yang,<sup>†</sup> Peijie Wang,<sup>†</sup> Yan Fang<sup>\*,†</sup>

<sup>†</sup> The Beijing Key Laboratory for Nano-Photonics and Nano-Structures, Department of Physics, Capital Normal University, Beijing 100048, China.

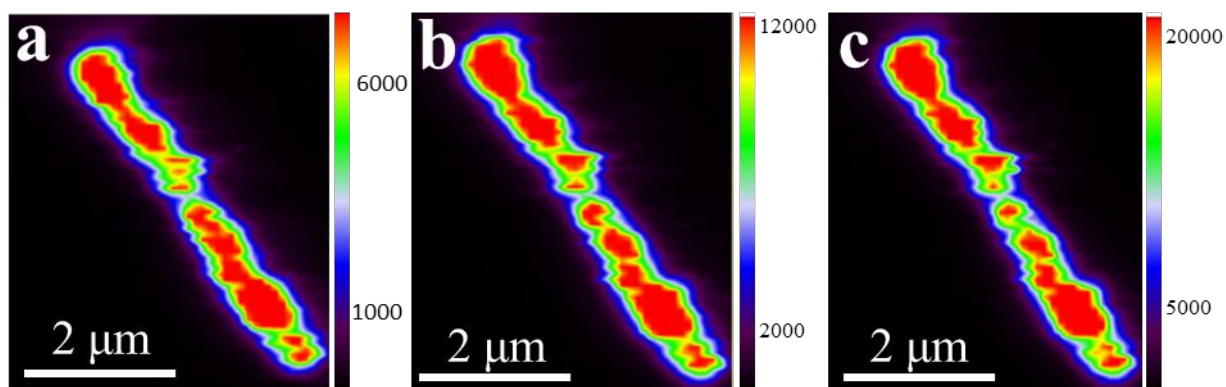

**Figure 1** (a)-(c) SERS mapping images on the surface-nanostructured single silver nanowire using the intensity of the Raman peaks at  $237\text{ cm}^{-1}$ ,  $1176\text{ cm}^{-1}$  and  $1368\text{ cm}^{-1}$ , respectively. The scale bar on the right of each image displays the color decoding scheme for different SERS intensities. The brighter the color of the bar, the higher the SERS enhancement.
